# Supplementary material for: Nitrogen accumulation accompanies ectomycorrhiza formation in pine germinants the first growing season after wildfire or clearcutting
Source: Research Square preprint supplement (doi:10.21203/rs.3.rs-6264068/v1), 2025-04-11
Supplement: Supplementary file 1 [file da5c6cb301822ec72c4c845d.docx]

**Supplemental material**

**Nitrogen accumulation accompanies ectomycorrhiza formation in pine germinants the first growing season after wildfire or clearcutting**

*Mycorrhiza*

Naomi K Yamaokaa,, Erica E Packarda,1, Melanie D Jonesa

1. Biology Department, University of British Columbia Okanagan campus, 1177 Research Road, Kelowna, British Columbia, Canada V1V 1V7

Corresponding author: Melanie D Jones; [melanie.jones@ubc.ca](mailto:melanie.jones@ubc.ca)

ORCID EEP: 0000-0002-3175-090X

ORCID MDJ: 0000-0001-5784-5184

1. Present address: Department of Soil and Environment, Swedish University of Agricultural Sciences, PO Box 7014, Uppsala, Sweden, 750 07

SI Table 1. List of accession numbers of sequenced fungi from root tips of ponderosa and lodgepole pine. Data available on NCBI <https://www.ncbi.nlm.nih.gov/nuccore>

| Sampling Month | Site Code | Accession | Identity |
| --- | --- | --- | --- |
| September | N3 | PV188580 | Ceratobasidiaceae |
| September | N3 | PV188581 | Cenococcum geophilum |
| September | N4 | PV188582 | Pustularia sp. |
| September | CL | PV188583 | Coltricia confluens |
| October | Law | PV188584 | Pustularia sp. |
| October | GW | PV188585 | Wilcoxina mikolae |
| October | N2 | PV188586 | Pustularia sp. |
| October | GW | PV188587 | Wilcoxina mikolae |
| October | N4 | PV188588 | Serendipita sp.1 |
| October | GE | PV188589 | Laccaria purpureobadia |
| October | GE | PV188590 | Pustularia sp. |
| October | N2 | PV188591 | Wilcoxina rehmii |
| October | N2 | PV188592 | Wilcoxina rehmii |
| September | GW | PV188593 | Pustularia sp. |
| October | N4 | PV188594 | Cenococcum geophilum |
| September | EW | PV188595 | Pustularia sp. |
| September | Law | PV188596 | Wilcoxina rehmii |
| September | N2 | PV188597 | Pustularia sp. |
| September | GW | PV188598 | Sphaerosporella brunnea |
| September | N4 | PV188599 | Wilcoxina rehmii |
| September | N2 | PV188600 | Wilcoxina rehmii |
| October | Law | PV188601 | Coltricia confluens |
| September | N4 | PV188602 | Hyaloscypha finlandica |
| September | N3 | PV188603 | Ceratobasidiaceae |
| September | N2 | PV188604 | Mallocybe |
| September | GE | PV188605 | Pustularia sp. |
| September | N2 | PV188606 | Wilcoxina rehmii |
| September | GE | PV188607 | Wilcoxina mikolae |
| September | N3 | PV188608 | Rhizopogon sp. |
| September | N4 | PV188609 | Wilcoxina rehmii |
| September | GE | PV188610 | Trichophaea sp.1 |
| September | N3 | PV188611 | Ceratobasidiaceae |
| September | GW | PV188612 | Wilcoxina rehmii |
| September | GE | PV188613 | Wilcoxina mikolae |
| September | Law | PV188614 | Wilcoxina rehmii |
| August | N4 | PV188615 | Wilcoxina rehmii |
| October | N3 | PV188616 | Pustularia sp. |
| September | GE | PV188617 | Wilcoxina mikolae |
| September | N2 | PV188618 | Phialocephala sp. |
| September | GW | PV188619 | Tulasnellaceae |
| September | N3 | PV188620 | Cenococcum geophilum |
| September | N2/N4 | PV188621 | Amphinema byssoides |
| September | N2 | PV188622 | Wilcoxina rehmii |
| September | N2 | PV188623 | Thelephoraceae |
| August | N4 | PV188624 | Wilcoxina rehmii |
| August | N4 | PV188625 | Wilcoxina rehmii |
| September | N3 | PV188626 | Wilcoxina rehmii |
| September | GE | PV188627 | Wilcoxina mikolae |
| September | GE | PV188628 | Laccaria purpureobadia |
| September | N2 | PV188629 | Wilcoxina rehmii |
| August | N4 | PV188630 | Amphinema byssoides |
| September | GW | PV188631 | Wilcoxina rehmii |
| September | GW | PV188632 | Sphaerosporella brunnea |
| September | Law | PV188633 | Wilcoxina rehmii |
| August | N3 | PV188634 | Cenococcum geophilum |
| September | Law | PV188635 | Wilcoxina rehmii |
| September | N2 | PV188636 | Wilcoxina rehmii |
| September | GE | PV188637 | Trichophaea sp.2 |
| September | Law | PV188638 | Wilcoxina rehmii |
| September | EW | PV188639 | Wilcoxina rehmii |
| September | EE | PV188640 | Pustularia sp. |
| September | EE | PV188641 | Pustularia sp. |
| September | CL | PV188642 | Wilcoxina rehmii |
| September | CL | PV188643 | Tomentella sp.1 |
| September | N4 | PV188644 | Wilcoxina rehmii |
| October | GE | PV188645 | Tomentella sp.1 |
| September | Law | PV188646 | Pustularia sp. |
| October | N3 | PV188647 | Ceratobasidiaceae |
| September | N3 | PV188648 | Cenococcum geophilum |
| September | N2 | PV188649 | Wilcoxina rehmii |
| September | CL | PV188650 | Thelephora sp. |
| September | CL | PV188651 | Cenococcum geophilum |
| September | EE | PV188652 | Cenococcum geophilum |
| September | N4 | PV188653 | Wilcoxina rehmii |
| August | GE | PV188654 | Trichophaea sp.2 |
| August | GE | PV188655 | Trichophaea sp.2 |
| August | N2 | PV188656 | Pustularia sp. |
| August | EE | PV188657 | Trichophaea sp.1 |
| July | EW | PV188658 | Pustularia sp. |
| October | N4 | PV188659 | Wilcoxina rehmii |
| October | N4 | PV188660 | Wilcoxina rehmii |
| August | GE | PV188661 | Tulasnellaceae |
| August | GE | PV188662 | Pustularia sp. |
| October | N3 | PV188663 | Ceratobasidiaceae |
| October | N3 | PV188664 | Ceratobasidiaceae |
| August | Law | PV188665 | Tomentella sp.1 |
| October | N2 | PV188666 | Wilcoxina rehmii |
| August | GE | PV188667 | Tulasnellaceae |
| October | N2 | PV188668 | Wilcoxina rehmii |
| July | EW | PV188669 | Trichophaea sp.1 |
| August | Law | PV188670 | Pustularia sp. |
| July | N4 | PV188671 | Wilcoxina rehmii |
| July | Law | PV188672 | Pustularia sp. |
| July | Law | PV188673 | Pustularia sp. |
| July | N2 | PV188674 | Wilcoxina rehmii |
| July | N2 | PV188675 | Wilcoxina rehmii |
| July | GE | PV188676 | Hebeloma sp. |
| July | GE | PV188677 | Wilcoxina rehmii |
| July | Law | PV188678 | Pustularia sp. |
| July | Law | PV188679 | Pustularia sp. |
| July | N2 | PV188680 | Wilcoxina rehmii |
| August | N2 | PV188681 | Wilcoxina rehmii |
| July | EW | PV188682 | Tulasnellaceae |
| July | EW | PV188683 | Wilcoxina rehmii |
| July | EE | PV188684 | Amphinema sp. |
| August | N2 | PV188685 | Wilcoxina rehmii |
| September | EE | PV188686 | Pustularia sp. |
| August | N2 | PV188687 | Pustularia sp. |
| August | GE | PV188688 | Wilcoxina rehmii |
| July | EW | PV188689 | Inocybe sp.1 |
| July | CL | PV188690 | Pustularia sp. |
| July | CL | PV188691 | Wilcoxina rehmii |
| August | GW | PV188692 | Wilcoxina mikolae |
| August | N2 | PV188693 | Wilcoxina rehmii |
| July | EE | PV188694 | Pustularia sp. |
| July | EE | PV188695 | Pustularia sp. |
| July | N4 | PV188696 | Tomentella sp.2 |
| July | N4 | PV188697 | Wilcoxina rehmii |
| July | EE | PV188698 | Pustularia sp. |
| July | N2 | PV188699 | Tomentella sp.2 |
| September | Law | PV188700 | Pustularia sp. |
| August | N3 | PV188701 | Ceratobasidiaceae |
| September | GW | PV188702 | Wilcoxina mikolae |
| August | N4 | PV188703 | Wilcoxina rehmii |
| September | GE | PV188704 | Tomentella sp.1 |
| September | GE | PV188705 | Trichophaea sp.1 |
| August | N2 | PV188706 | Wilcoxina rehmii |
| August | GE | PV188707 | Pustularia sp. |
| August | GW | PV188708 | Rhizopogon sp. |
| August | N2 | PV188709 | Wilcoxina rehmii |
| August | GE | PV188710 | Inocybe sp.2 |
| July | N4 | PV188711 | Pustularia sp. |
| July | N4 | PV188712 | Pustularia sp. |
| July | N2 | PV188713 | Wilcoxina rehmii |
| July | N2 | PV188714 | Wilcoxina rehmii |
| July | CL | PV188715 | Coltricia confluens |
| July | CL | PV188716 | Tomentella sp.3 |
| July | EE | PV188717 | Pustularia sp. |
| July | EE | PV188718 | Pustularia sp. |
| July | CL | PV188719 | Pustularia sp. |
| October | GE | PV188720 | Trichophaea sp.3 |
| September | EE | PV188721 | Wilcoxina rehmii |
| September | CL | PV188722 | Wilcoxina rehmii |
| September | CL | PV188723 | Cenococcum geophilum |
| October | Law | PV188724 | Pustularia sp. |
| August | Law | PV188725 | Pustularia sp. |
| August | GW | PV188726 | Pustularia sp. |
| July | CL | PV188727 | Hebeloma sp. |
| September | EE | PV188728 | Wilcoxina rehmii |
| September | N4 | PV188729 | Wilcoxina rehmii |
| September | N3 | PV188730 | Tulasnellaceae |
| July | EE | PV188731 | Pustularia sp. |
| July | N2 | PV188732 | Tomentella sp.4 |
| October | N3 | PV188733 | Serendipita sp.2 |
| September | EW | PV188734 | Pustularia sp. |
| September | EW | PV188735 | Pustularia sp. |
| September | CL | PV188736 | Pustularia sp. |
| September | CL | PV188737 | Pustularia sp. |
| September | EE | PV188738 | Wilcoxina rehmii |
| September | EE | PV188739 | Pustularia sp. |
| September | EW | PV188740 | Pustularia sp. |

| SI Table 2. Soil nutrient concentrations (mg kg-1 (standard error)) determined by microwave digestion followed by ICP-MS for soils from disturbed ponderosa pine wildfire (PPWF), lodgepole pine wildfire (LPWF) and lodgepole pine clearcut (LPCC) sites, and soils from adjacent undisturbed area. n=3 sites. Disturbed soils were collected in the spring of 2019, undisturbed in the spring 2020.   |  | Al | Ca | Cu | Fe | K | Mg | Mn | Na | P | Zn | | --- | --- | --- | --- | --- | --- | --- | --- | --- | --- | --- | | PPWF | 20333.33 (1855.92) | 15166.67  (7917.98) | 37.00  (18.25) | 16333.33  (1855.92) | 1966.67  (166.67) | 3966.67  (1271.92) | 653.33  (14.53) | 1453.33  (246.67) | 570.00  (92.92) | 68.33  (7.86) | | PPWF Undisturbed | 19666.67  (666.67) | 5966.67  (1072.90) | 9.70  (1.15) | 16000.00  (577.35) | 2133.33  (338.30) | 3066.67  (317.98) | 656.67  (84.13) | 1000.00  (400.37) | 636.67  (197.68) | 78.33  (14.05) | | LPWF | 21333.33  (333.33) | 8266.67  (185.59) | 18.33  (3.28) | 17333.33  (881.92) | 1433.33  (240.37) | 3833.33  (290.59) | 373.33  (108.68) | 1233.33  (33.33) | 1063.33  (172.47) | 53.33  (15.34) | | LPWF Undisturbed | 21333.33  (3527.67) | 5766.67  (581.19) | 21.67  (3.93) | 18333.33  (2185.81) | 1500.00  (251.66) | 3666.67  (683.94) | 460.00  (126.62) | 1286.67  (217.97) | 593.33  (112.89) | 60.00  (13.65) | | LPCC | 18000.00  (3785.94) | 6166.67  (2967.79) | 15.93  (9.05) | 14900.00  (3865.66) | 1633.33  (296.27) | 2866.67  (1386.04) | 656.33  (317.90) | 1350.00  (510.72) | 796.67  (302.78) | 68.33  (20.74) | | LPCC Undisturbed | 15666.67  (1763.83) | 2133.33  (185.59) | 12.47  (2.49) | 11733.33  (1392.04) | 1366.67  (66.67) | 1376.67  (321.26) | 562.67  (329.63) | 1766.67  (371.18) | 810.00  (313.74) | 76.67  (32.42) | |
| --- | --- | --- | --- | --- | --- | --- | --- | --- | --- | --- | --- | --- | --- | --- | --- | --- | --- | --- | --- | --- | --- | --- | --- | --- | --- | --- | --- | --- | --- | --- | --- | --- | --- | --- | --- | --- | --- | --- | --- | --- | --- | --- | --- | --- | --- | --- | --- | --- | --- | --- | --- | --- | --- | --- | --- | --- | --- | --- | --- | --- | --- | --- | --- | --- | --- | --- | --- | --- | --- | --- | --- | --- | --- | --- | --- | --- | --- |
|  |

SI Table 3. Percent of root tips colonized per seedling for sown mycorrhizal seedlings of ponderosa pine from wildfire (PPWF), and lodgepole pine from wildfire (LPWF) and clearcut (LPCC) sites. The range of number (n) of seedlings colonized per site per month are shown.

| Site | n | Site Type | Mean percent colonization (SD) | | | |
| --- | --- | --- | --- | --- | --- | --- |
|  |  |  | Jul | Aug | Sept | Oct |
| Chute Lake | 2-9 | PPWF | 24.5 (14.9) | 59.6 (4.0) | 69.1 (13.8) | n/a2 |
| Eneas (East) | 2-10 | PPWF | 27.5 (20.5) | 42.4 (17.2) | 42.8 (23.8) | n/a2 |
| Eneas (West) | 8-9 | PPWF | n/a1 | 34.6 (16.5) | 62.1 (23.7) | n/a2 |
| Law | 4-10 | LPWF | 32.3 (27.9) | 52.5 (27.2) | 30.5 (21.3) | 57.0 (33.4) |
| Gotffriedson (East) | 2-10 | LPWF | 68.0 (17.0) | 65.2 (13.5) | 82.9 (15.8) | 82.4 (19.8) |
| Gotffriedson (West) | 6-10 | LPWF | n/a1 | 52.3 (23.0) | 70.9 (13.4) | 48.3 (27.7) |
| 12-N2 | 6-10 | LPCC | 55.2 (25.2) | 79.6 (20.5) | 69.1 (14.2) | 96.6 (6.1) |
| 12-N3 | 1-10 | LPCC | 44.03 | 46.6 (34.6) | 64.1 (21.1) | 78.0 (23.0) |
| 12-N4 | 6-10 | LPCC | 68.5 (29.5) | 74.0 (22.7) | 60.4 (12.0) | 84.9 (13.7) |

1. No seedlings were colonized at this site.
2. No seedlings were collected
3. Fewer than three seedlings were colonized at this site.

SI Table 4. Percent of root tips colonized per seedling for naturally regenerating mycorrhizal seedlings of ponderosa pine seedlings from wildfire (PPWF), and lodgepole from wildfire (LPWF) and clearcut (LPCC) sites. The range of number (n) of seedlings colonized per site per month are shown.

|  | n | Site Type | Mean percent colonization (SD) | | | | |
| --- | --- | --- | --- | --- | --- | --- | --- |
|  |  |  | Jun | Jul | Aug | Sept | Oct |
| Chute Lake | 3-4 | PPWF | n/a1 | 80.0 (12.0) | 78.3 (15.8) | 96.0 (6.1) | n/a2 |
| Eneas (East) | 3 | PPWF | n/a1 | 37.0 (29.2) | 48.0 (30.5) | 40.7 (33.0) | n/a2 |
| Eneas (West) | 3 | PPWF | n/a1 | 65.7 (15.0) | 66.7 (27.1) | 83.3 (11.7) | n/a2 |
| Law | 1-4 | LPWF | 93 | 61.5 (44.6) | 49.0 (36.6) | 33.7 (29.3) | 70.3 (34.6) |
| Gotffriedson (East) | 3-4 | LPWF | 40.0 (13.1) | 47.7 (24.7) | 89.3 (8.2) | 84.0 (15.5) | 99.7 (0.6) |
| Gotffriedson (West) | 3-4 | LPWF | n/a1 | 46.3 (24.7) | 72.7 (12.1) | 78.0 (9.53) | 99 (1.7) |

1. No seedlings were colonized at this site.
2. No seedlings were collected
3. < 3 colonized seedlings at this site.

SI Table 5. Results from linear mixed models using type III ANOVA with Satterthwaite’s method of sown seedling characteristics of ponderosa pine seedlings from wildfire (PPWF), and lodgepole pine from wildfire (LPWF) and clearcuts (LPCC) over the growing season. Significant differences among sample months (random factor: site, fixed factor: month) are bolded.

|  |  |  | | Seedling biomass (log (g)) | |  |  |  | Total N content  (log(mg)) |  |  |  |
| --- | --- | --- | --- | --- | --- | --- | --- | --- | --- | --- | --- | --- |
|  | Sums  of Squares | F | df | | P | |  | Sums of Squares | F | df | P |  |
| PPWF | 16.42 | 161.6 | 3 | | **<0.001** | |  | 10.66 | 110.7 | 3 | **<0.001** |  |
| LPWF | 31.97 | 167.9 | 4 | | **<0.001** | |  | 16.66 | 81.18 | 4 | **<0.001** |  |
| LPCC | 33.49 | 103.8 | 4 | | **<0.001** | |  | 14.47 | 29.27 | 4 | **<0.001** |  |

SI Table 6. Weight, carbon and nitrogen content of the ponderosa and lodgepole pine seeds used in this study. Standard error is shown in brackets, n=5 seeds.

|  | Total dry weight (mg) | | % N | δ 13C | δ 15N | Total C (mg) | Total N (mg) |
| --- | --- | --- | --- | --- | --- | --- | --- |
| Ponderosa | | 2.27 (0.17) | 5.6  (0.3) | -22.32 (0.34) | -3.08 (0.30) | 12.16 (0.93) | 1.26  (0.09) |
| Lodgepole | | 0.213 (0.025) | 6.2  (0.1) | -22.12 (0.57) | -2.56 (0.28) | 1.10  (0.13) | 0.13  (0.02) |

SI Table 7. Concentrations (mg kg-1 (standard error)) of macronutrients in root and shoot tissues of seedlings collected in Fall 2019, as determined by microwave digestion followed by ICP-MS. n=3 sites. Data shown for ponderosa pine seedlings from wildfire (PPWF), and lodgepole pine from wildfire (LPWF) and clearcuts (LPCC). Values were compared to Brockley (2001a) for foliar nutrient concentrations, and all were determined to be adequate.

| Site | Ca | K | Mg | P | S |
| --- | --- | --- | --- | --- | --- |
| Sown PPWF roots | 3866.67  (440.96) | 7933.33  (66.67) | 1400.00  (100.00) | 2333.33  (145.30) | 1500.00  (57.74) |
| Sown PPWF shoots | 2633.33  (333.33 | 9866.67  (133.33) | 1100.00  (57.74) | 2933.33  (202.76) | 1966.67  (33.33) |
| Naturally regenerating PPWF roots | 3266.67  (176.38) | 7366.67  (440.96) | 1233.33  (66.67) | 2200.00  (57.74) | 1566.67  (88.19) |
| Naturally PPWF shoots | 2466.67  (260.34 | 9466.67  (338.30) | 1166.67  (66.67) | 2633.33  (145.30) | 1833.33  (66.67) |
| Sown LPWF roots | 2043.33  (684.75) | 6900.00  (1662.33) | 1163.33  (243.61) | 1933.33  (417.67) | 1650.001  (50.00) |
| Sown LPWF shoots | 1766.67  (218.58) | 9666.67  (176.38) | 1133.33  (88.19) | 2833.33  (202.76) | 1800.00  (152.75) |
| Naturally regenerating LPWF roots | 3700.00  (1100.00) | 11166.67  (2445.63) | 2100.00  (251.66) | 4066.67  (817.18) | 2100.00  (602.77) |
| Naturally regenerating LPWF shoots | 1733.33  (166.67) | 9400.00  (300.00) | 1153.33  (100.88) | 2833.33  (233.33) | 1733.33  (88.19) |
| Sown LPCC roots | 2063.33  (647.05) | 8100.00  (2281.08) | 1036.67  (325.08) | 3033.33  (829.32) | 1430.00  (331.51 |
| Sown LPCC shoots | 1566.67  (66.67) | 9833.33  (638.57) | 1166.67  (66.67) | 3100.00  (100.00) | 1700.00  (100.00) |

1. n < 3

SI Table 8. Concentrations (mg kg-1 (standard error)) of micronutrients and Al in root and shoot tissues of seedlings collected in September as determined by microwave digestion followed by ICP-MS. < DL = below detection limit. n=3 sites. Data shown for ponderosa pine seedlings from wildfire (PPWF), and lodgepole pine from wildfire (LPWF) and clearcuts (LPCC). Values were compared to Brockley (2001a) for foliar nutrient concentrations (of all except Al, Mo and Na), and all that had reached the detection limit were determined to be adequate.

| Site | Al | B | Cu | Fe | Mn | Mo | Na | Zn |
| --- | --- | --- | --- | --- | --- | --- | --- | --- |
| Sown PPWF roots | 3366.67  (260.34) | 13.001  (0.00) | 20.33  (5.46) | 3266.67  (218.58) | 133.00  (24.27) | 1.87  (0.93) | 260.00 (36.06) | 69.00  (7.00) |
| Sown PPWF shoots | 316.67  (24.04) | 18.00  (1.15) | 7.33  (0.28) | 333.33  (24.04) | 196.67  (48.07) | 0.79  (0.26) | 40.00  (4.62) | 80.67  (3.71) |
| Naturally PPWF roots | 2333.33  (272.85) | 12.00  (1.53) | 28.33  (1.76) | 2366.67  (284.80) | 130.00  (11.55) | 2.40  (1.01) | 153.33  (20.28) | 61.00  (5.51) |
| Naturally PPWF shoots | 403.33  (46.31) | 25.00  (5.51) | 10.00  (1.01) | 426.67  (71.26) | 183.33  (18.56) | 1.121  (0.38) | 35.33  (3.38) | 82.00  (9.07) |
| Sown LPWF roots | 3433.33  (633.33) | < DL | 14.07  (3.54) | 3633.33  (520.68) | 210.00  (110.15) | < DL | 283.33  (49.10) | 63.00  (22.61) |
| Sown LPWF shoots | 370.00  (45.09) | 19.00  (2.52 | 5.70  (0.12) | 190.00  (30.55) | < DL | < DL | 41.33  (8.09) | 63.67  (9.91) |
| Naturally regenerating LPWF roots | 6333.33  (328.30) | 32.33  (6.67) | 52.67  (10.09) | 6700.00  (305.51) | 336.67  (197.43) | 2.05  (1.24) | 456.67  (34.80) | 114.67  (42.70) |
| Naturally regenerating LPWF shoots | 443.33  (29.06) | 22.33  (0.88) | 7.73  (0.19) | 170.00  (0.00) | 200.00  (55.08) | < DL | 40.67  (1.67) | 57.67  (0.67) |
| Sown LPCC roots | 907.38  (363.33) | < DL | 16.60  (5.30) | 2333.33  (592.55) | 310.00  (87.18) | < DL | 280.00  (101.16) | 121.00  (44.84) |
| Sown LPCC shoots | 363.33  (69.60) | 14.501  (1.50) | 6.17  (0.43) | 143.33  (8.82) | 330.00  (81.85) | < DL | 52.33  (7.31) | 80.00  (2.08) |

1. n < 3

SI Table 8. Results of PERMANOVAs comparing fungal communities on roots of mycorrhizal pine seedlings among months (Jul-Oct) for ponderosa pine from wildfire sites (PPWF) and lodgepole pine seedlings from clearcut (LPCC) and wildfire (LPWF) sites.

|  | Df | Sums of Squares | F Value | R2 | P |
| --- | --- | --- | --- | --- | --- |
| PPWF | 2 | 0.494 | 1.709 | 0.406 | 0.199 |
| LPWF | 3 | 0.1792 | 0.286 | 0.087 | 0.945 |
|  |  |  |  |  |  |
| LPCC | 3 | 0.354 | 0.386 | 0.126 | 0.997 |


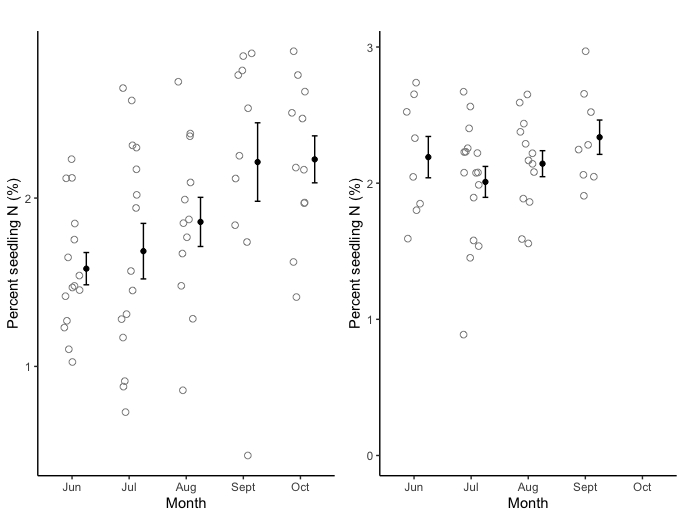


82

b.

69

63

68

27

0

100 %

100 %

91

*

*

Shoot N Concentration (%)

SI Figure 1. Percent (%) N of naturally regenerating (a) ponderosa pine and (b) lodgepole pine shoots the first growing season following wildfire. Percent (%) of seedlings colonized across all three sites is shown at the top of each figure. Each open circle represents one seedling. Black points and error bars indicate mean and standard error of each month. Red asterisks indicate a significant difference from June.


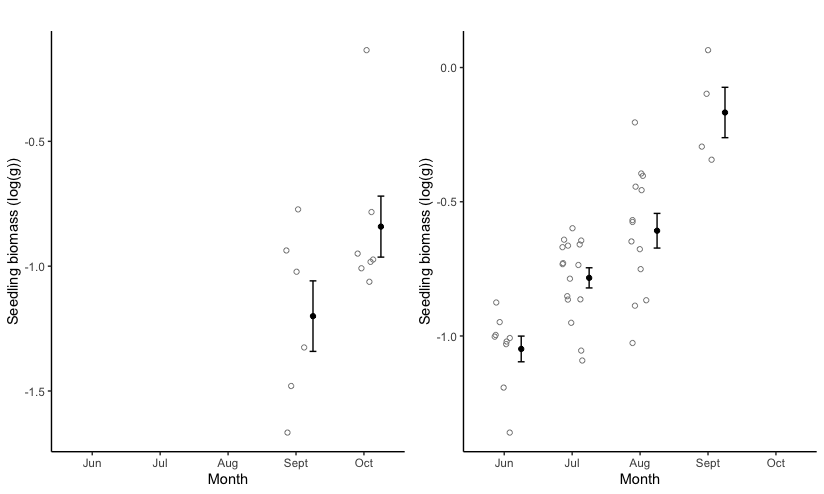


*

*

*

*

b.

SI Figure 2. Biomass (log(g)) of (a) naturally regenerating lodgepole pine, and (b) ponderosa pine seedlings, both from burned sites over the first growing season following the wildfires. Each open circle represents one seedling. Black points and error bars indicate mean and standard error of each month. Red asterisks indicate a significant difference from the first month sampled (Table 7).


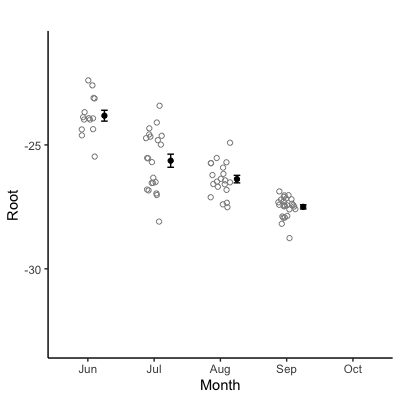

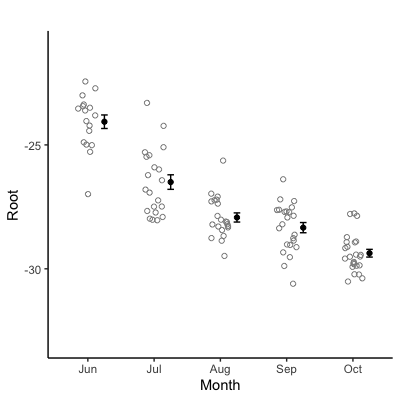

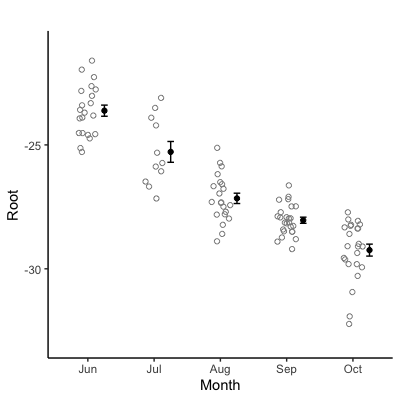


δ 13C

δ 13C

δ 13C

*

*

*

*

*

*

*

*

*

*

*

*

*

*

*

*

*

*

*

*

*

*

δ 13C

δ 13C

δ 13C

a.

b.

c.

d.

e.

f.

SI Figure 3. Root and shoot δ13C of sown ponderosa pine seedlings from (a, b) burned sites and lodgepole pine from (c, d) burned and (e, f) clearcut sites the first growing season following a disturbance. The hashed line indicates the seed δ13C of the seedlot from which these seedlings germinated (-22.732 ± 0.76 in ponderosa pine, -22.12 ± 0.54 in lodgepole pine). Each open circle represents one seedling. Black points and error bars indicate mean and standard error of each month. Red asterisks indicate significant differences from June.


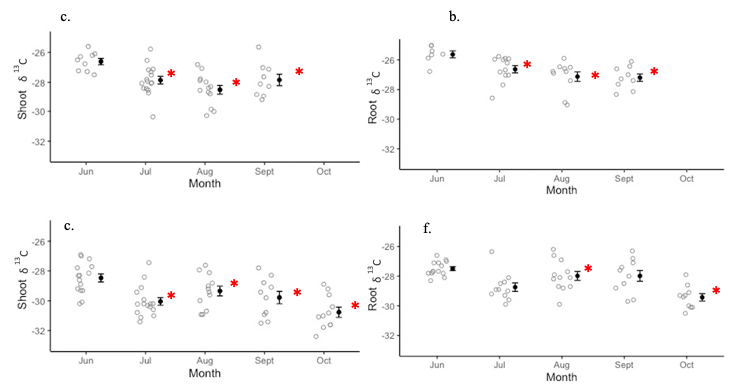


d.

a.

SI Figure 4. δ13C of roots and shoots of naturally regenerating (a, b) ponderosa pine, and (c, d) lodgepole pine seedlings from burned sites the first growing season following the fires. Each open circle represents one seedling. Black points and error bars indicate mean and standard error of seedlings sampled each month. Red asterisks indicate significant differences from June.

b.

SI Figure 5. Total N (log(mg)) of naturally regenerating (a) lodgepole pine and (b) ponderosa pine shoots the first growing season following wildfire. Each open circle represents one seedling. Black points and error bars indicate mean and standard error of each month. Red asterisks indicate significant differences from June at P < 0.05; red circles indicate P <0.1.


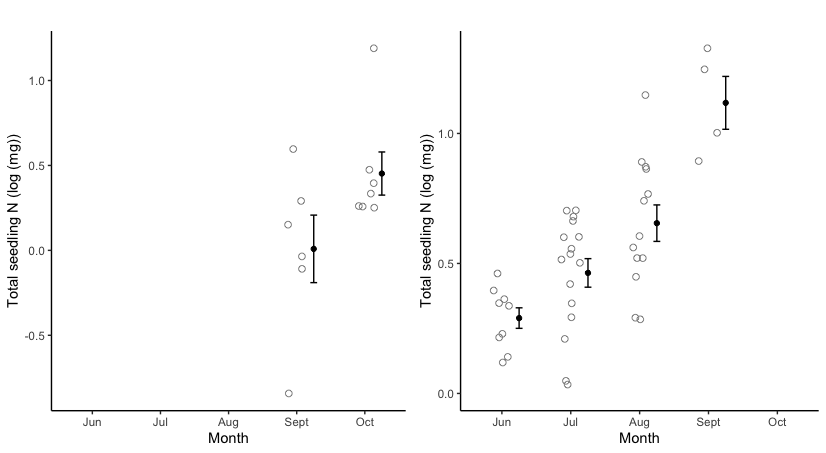


*

*

◦

SI Figure 6. Root and shoot δ 15N of naturally regenerating (a, b) ponderosa pine and (c, d) lodgepole pine seedlings over the first growing season following wildfire. Each open circle represents one seedling. Black points and error bars indicate mean and standard error of seedlings sampled during each month. Red asterisks indicate a significant difference from June.


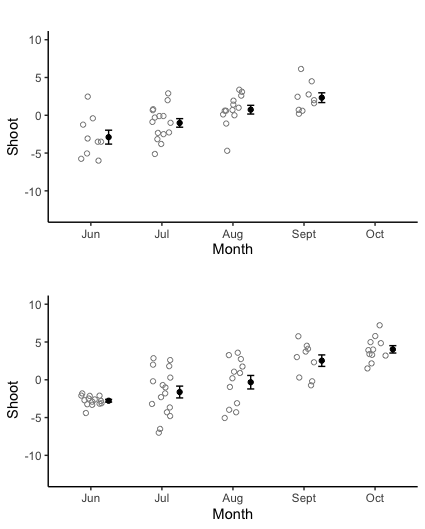

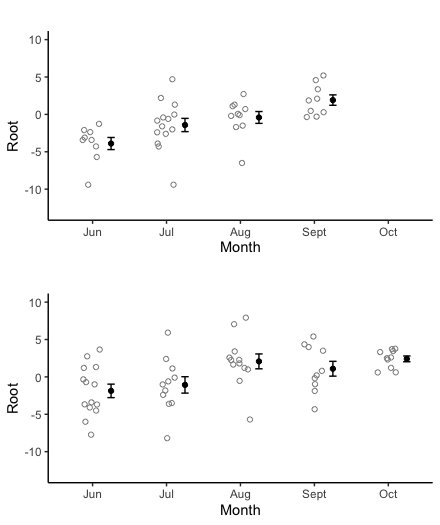


δ 15N

δ 15N

a.

d.

c.

b.

*

*

*

*

*

*

*

*

*

*

*

*

δ 15N

δ 15N


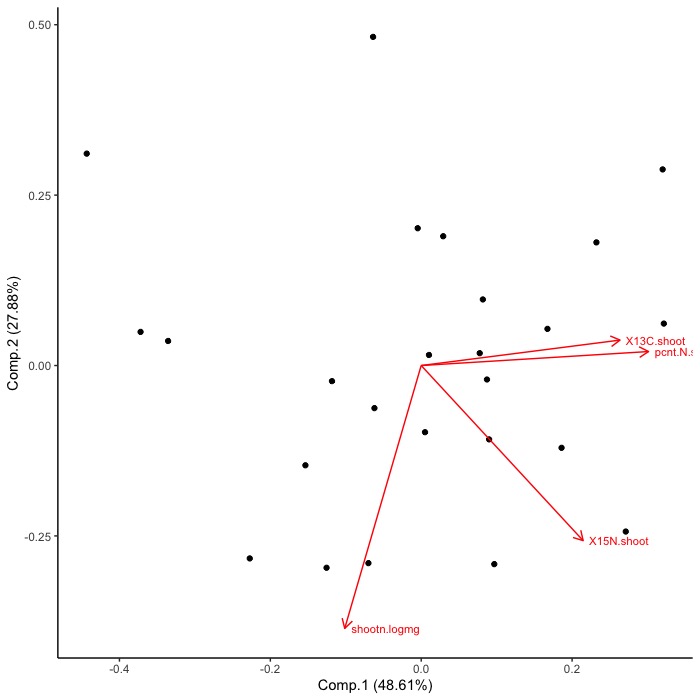

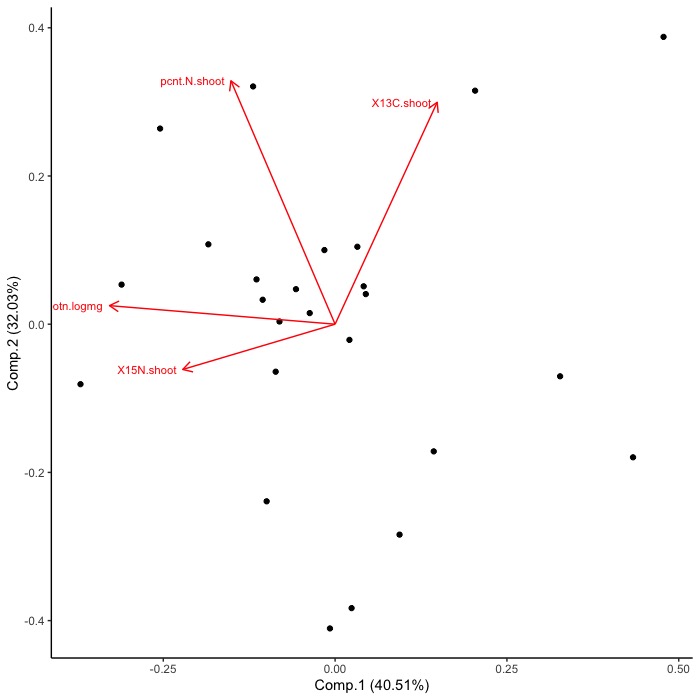


Total N

Total N

15N

15N

13C

13C

% N

% N


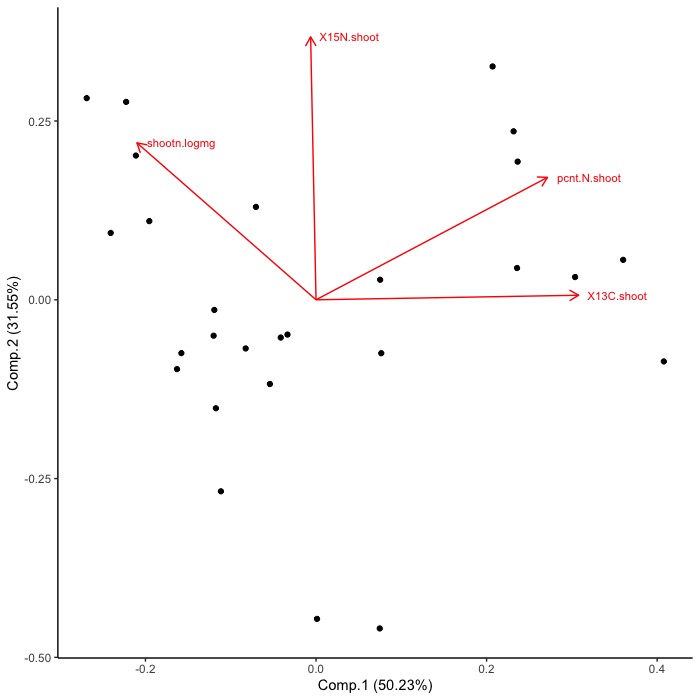


Total N

15 N

% N

13 C

e.


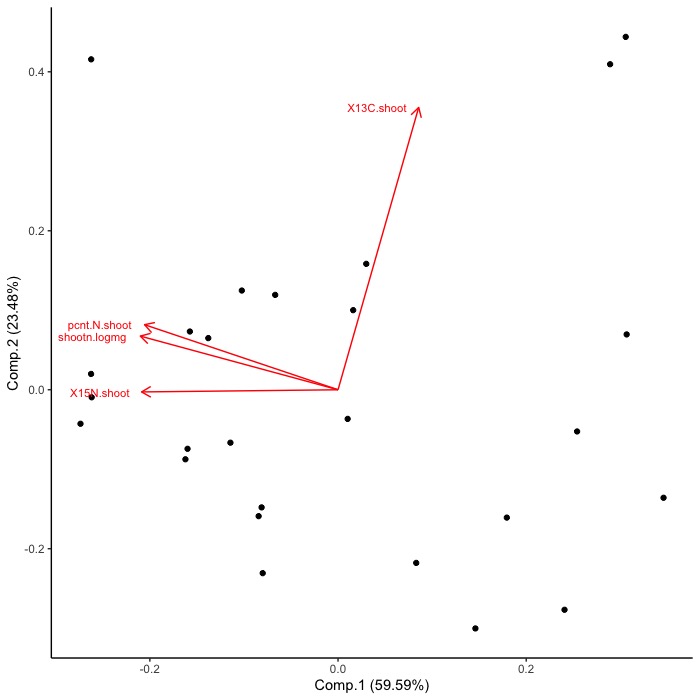


Total N

% N

15 N

13 C

.

x


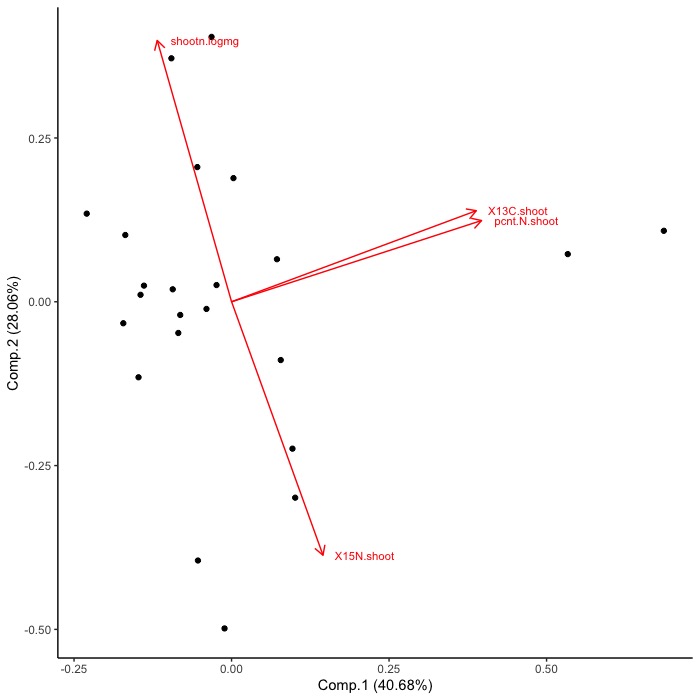


Total N

% N

15 N

13 C


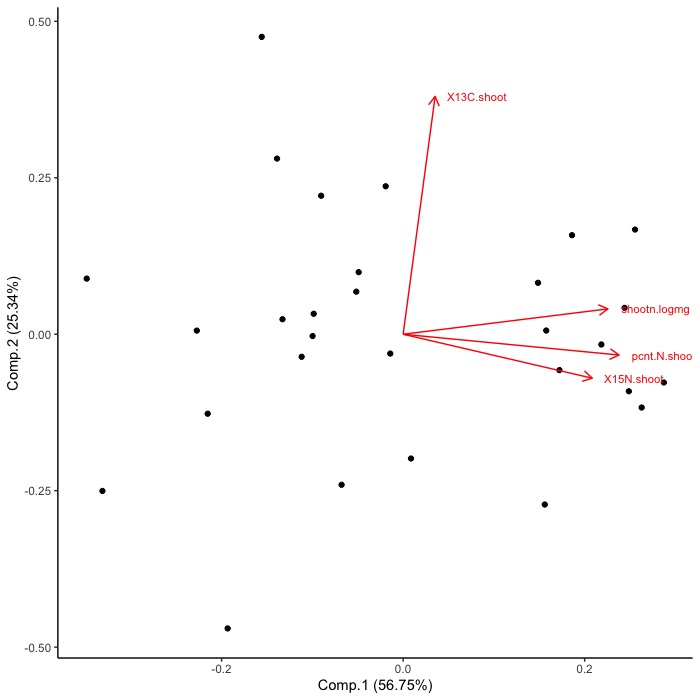


13 C

Total N

% N

15 N

b.

c.

d.

a.

e.

f.

Figure R A6. Root and shoot δ 15N values of naturally regenerating (a) ponderosa pine seedlings from burned sites, and (b) lodgepole pine from in months where both mycorrhizal and nonmycorrhizal seedlings were present. Solid points and error bars indicate mean and standard error of each month. Red asterisks indicate significance (p < 0.05) difference between mycorrhizal and nonmycorrhizal seedlings.

SI Figure 7. Principal coordinate analysis based on seedling characteristics for sown ponderosa pine seedlings collected from burned sites in (a) July and (b) August, lodgepole pine seedlings collected from burned sites in (c) July and (d) August, and lodgepole pine seedlings collected from clearcuts in (d) July and (e) August. Mycorrhizal seedlings are shown in black and nonmycorrhizal seedlings in grey.

SI Figure 8. Principal coordinate analysis based on seedling characteristics for naturally regenerating ponderosa pine seedlings from collected burned sites in (a) July and (b) August, lodgepole pine seedlings collected from burned sites in (c) June and (d) July. Mycorrhizal seedlings are shown in black and nonmycorrhizal seedlings in grey.


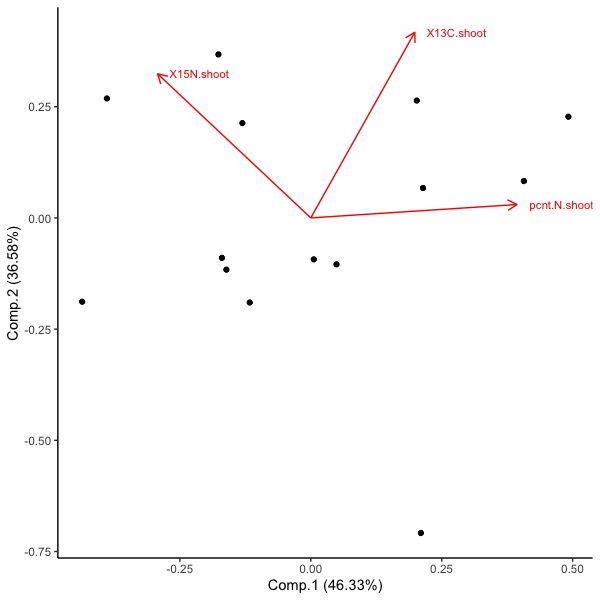

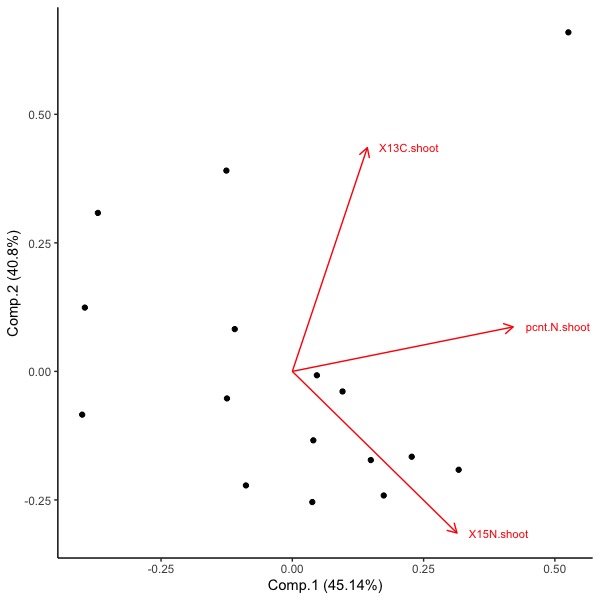

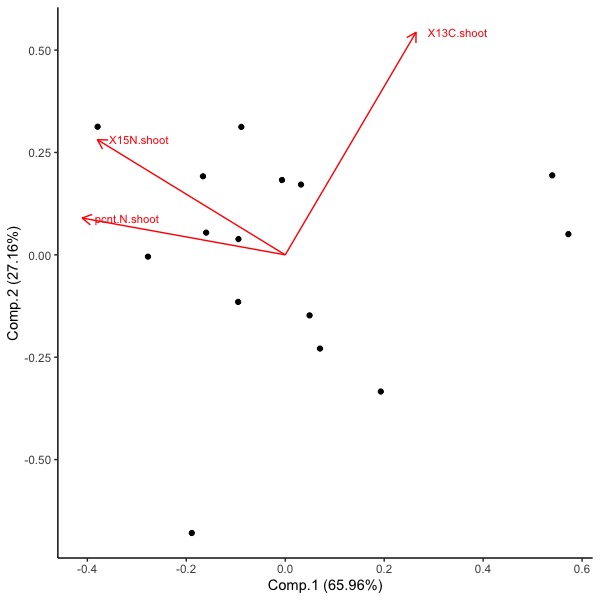

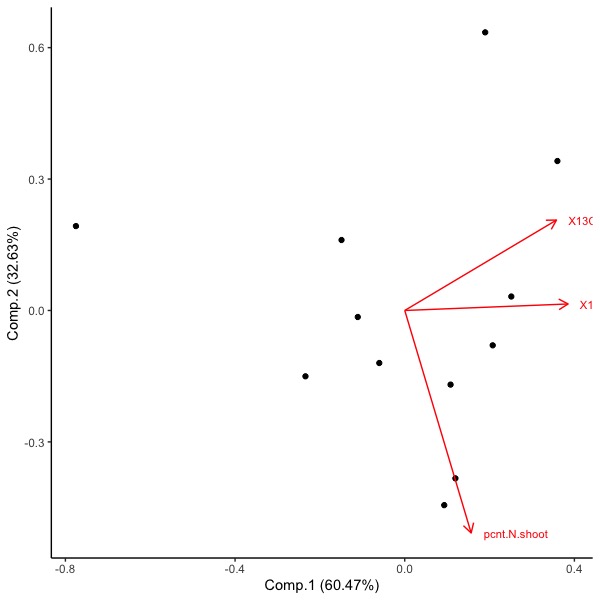


13C

15N

13C

% N

15N

13C

% N

% N

15N

13C

% N

15N

b.

a.

c.

d.


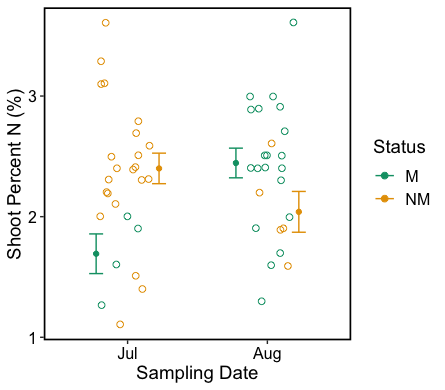

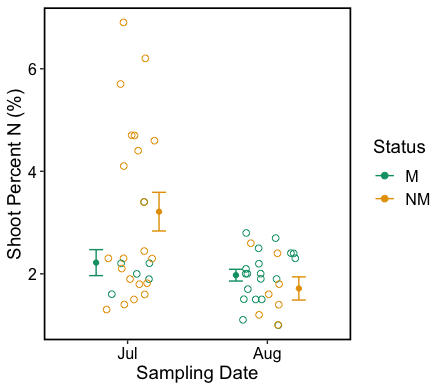

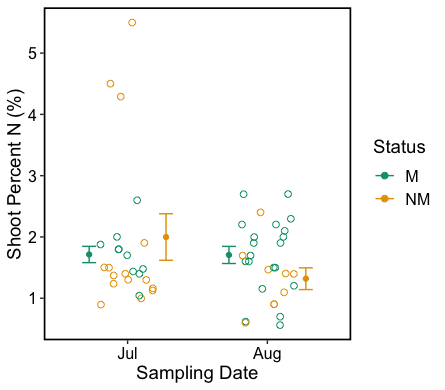


a.

b.

c.

SI Figure 9. Shoot percent (%) N of sown (a) ponderosa pine shoots from burned sites, and lodgepole pine seedlings from (b) burned sites, and (c) clearcuts in months where both mycorrhizal and nonmycorrhizal seedlings were present. Each open circle represents one seedling. Solid points and error bars indicate mean and standard error of each month. See Table 6 for results of statistical analyses.


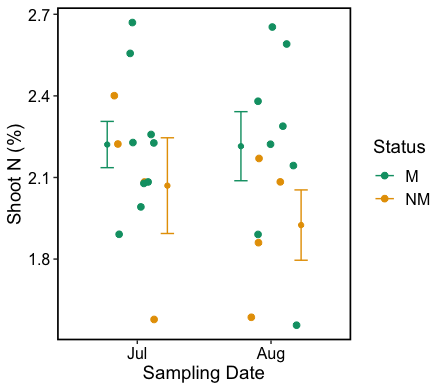

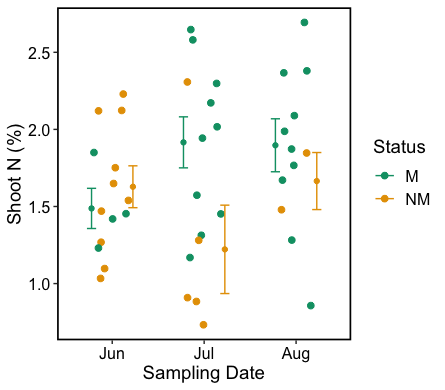


b.

SI Figure 10. Shoot percent (%) N of naturally regenerating (a) ponderosa pine, and (b) lodgepole pine shoots from burned sites in months where both mycorrhizal and nonmycorrhizal seedlings were present (July, August only in (a)). Points with error bars indicate mean and standard error. There was no main effect of mycorrhizal status, but there was a significant interaction between month and mycorrhizal status for lodgepole pine seedlings (Table 7).

Ponderosa Pine
Wildfire


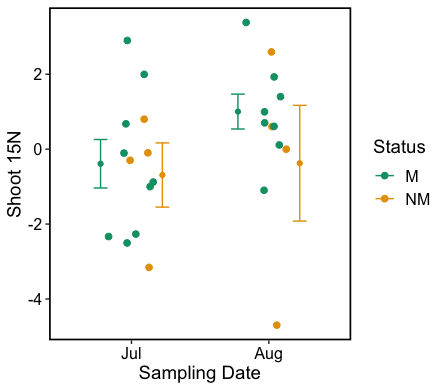

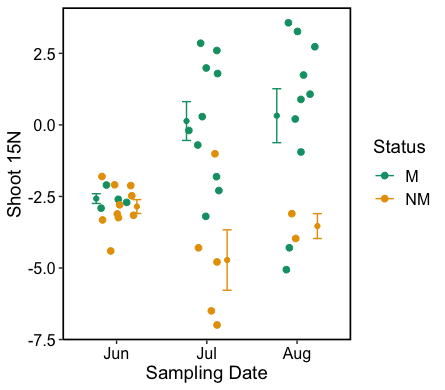


Lodgepole Pine
Wildfire


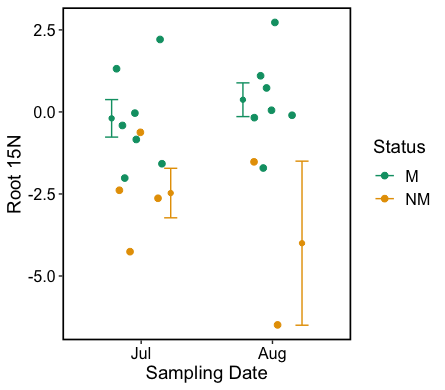

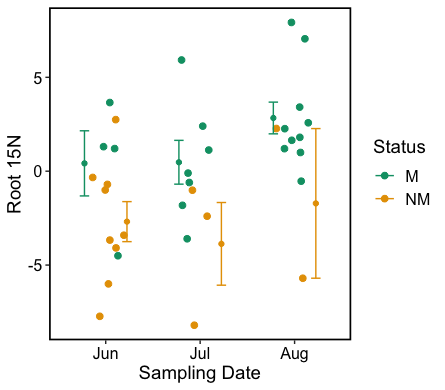


*

*

δ 15N

δ 15N

δ 15N

δ 15N

*

a.

b.

*

d.

c.

SI Figure 11. Root and shoot δ 15N values of naturally regenerating (a) ponderosa pine and (b) lodgepole pine seedlings from burned sites, in months where both mycorrhizal and nonmycorrhizal seedlings were present. Points attached to error bars indicate mean and standard error of each month. Red asterisks indicate significant (Table 9) differences between mycorrhizal and nonmycorrhizal seedlings across months.

Ponderosa Pine
Wildfire

Lodgepole Pine
Wildfire


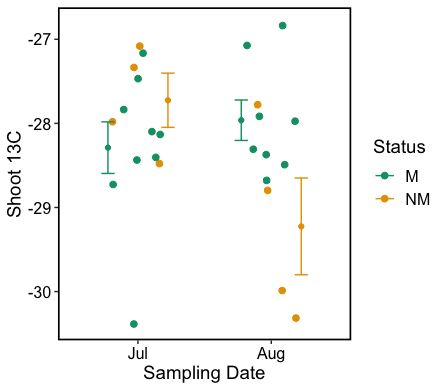

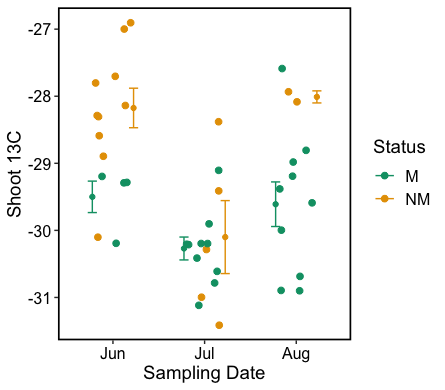


δ 13C

δ 13C


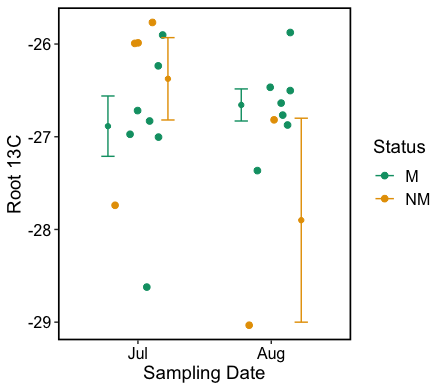

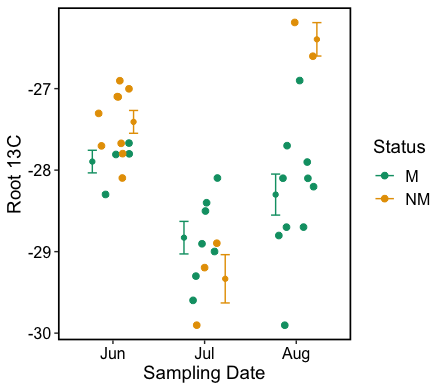


δ 13C

δ 13C

*

*

a.

b.

c.

d.

SI Figure 12. δ 13C values of roots and shoots of naturally regenerating (a, b) ponderosa pine and (c, d) lodgepole pine seedlings from burned sites in months where both mycorrhizal and nonmycorrhizal seedlings were present. Points associated with error bars indicate mean and standard error of each month. Red asterisks indicate significant differences between mycorrhizal and nonmycorrhizal seedlings across months (Table 9).


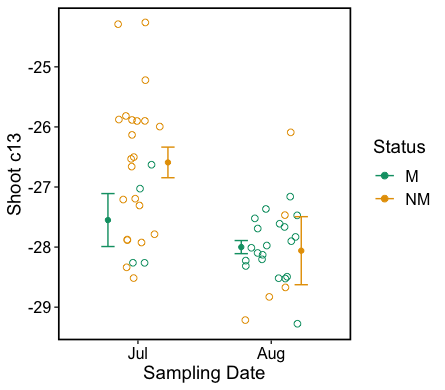

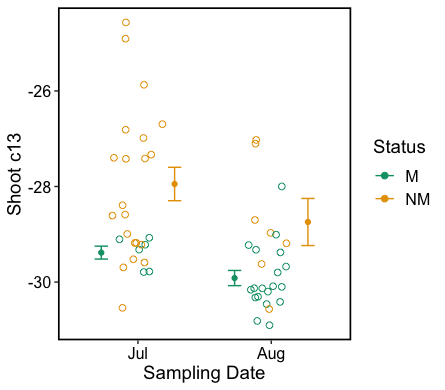

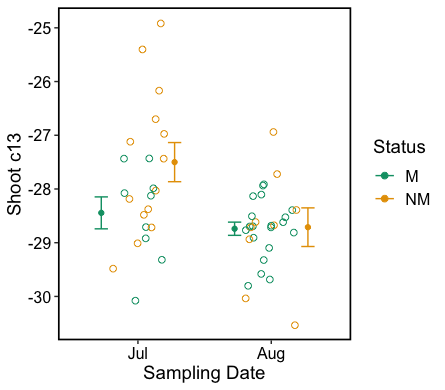

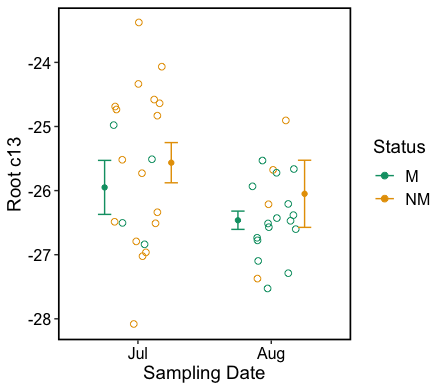

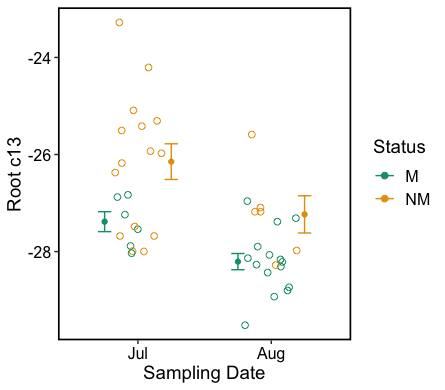

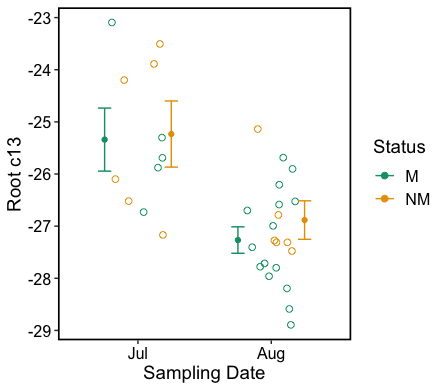


δ 13C

δ 13C

δ 13C

δ 13C

δ 13C

a.

b.

δ 13C

d.

*

e.

f.

c.

*

SI Figure 13. Root and shoot δ13 C values of sown (a, b) ponderosa pine seedlings from burned sites, and lodgepole pine from (c, d) burned sites and (e, f) clearcuts in months where both mycorrhizal and nonmycorrhizal seedlings were present. Each open circle represents one seedling. Solid points and error bars indicate mean and standard error of each month. Red asterisks indicate significant (P ≤ 0.05) differences between mycorrhizal and nonmycorrhizal seedlings across months (Table 8).


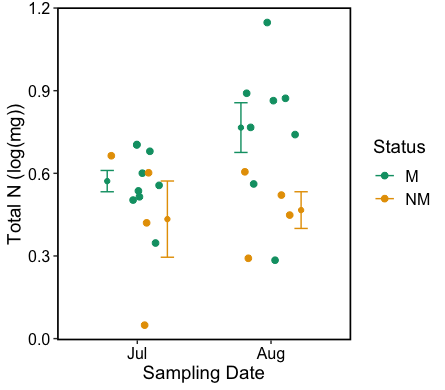


*

SI Figure 14. Total N (log(mg)) of shoots of naturally regenerating ponderosa pine seedlings from burned sites in months where both mycorrhizal and nonmycorrhizal seedlings were present. Points attached to error bars indicate mean and standard error of each month. Red asterisks indicate a significant (P < 0.05) difference between mycorrhizal and nonmycorrhizal seedlings across months (Table 7).


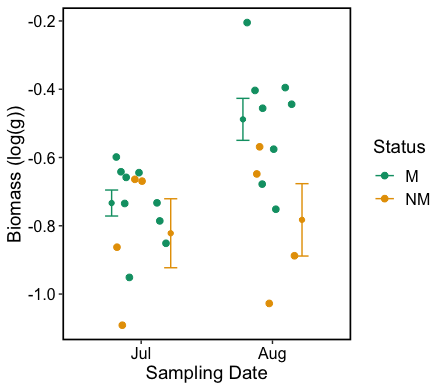


SI Figure 15. Biomass (log(g)) of naturally regenerating ponderosa pine seedlings (shoot + root) from burned sites in months where both mycorrhizal and nonmycorrhizal seedlings were present. Points attached to error bars indicate mean and standard error of each month. See Table 7 for results of statistical analyses.


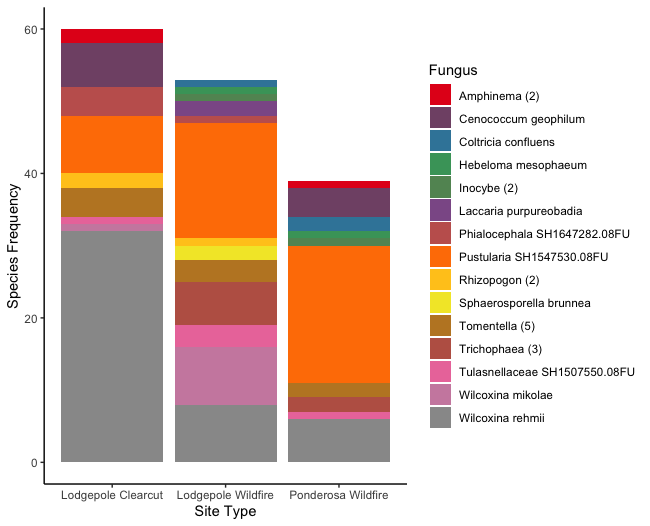


Frequency of occurrence (number of seedlings on which each taxon was found)

SI Figure 16. The number of seedlings on which each fungal taxon was found over the sampling period following disturbance by wildfire or clearcut logging: July-October for lodgepole pine seedlings, and July-September for ponderosa pine seedlings. When there was more than one ectomycorrhizal fungal species on a seedling, the dominant species was selected to represent that seedling. If more than one species of each genus was found, the number of species is shown in brackets, with the exception of Wilcoxina spp. Species that only occurred once across all three site types were omitted. Lodgepole pine seedlings from clearcuts (60), and wildfire sites (53), and ponderosa pine seedlings from wildfire sites (38) were included.

Appendix B- Methods

Extraction and determination of soil NH4+ and NO3- (adapted from Dr. Tim Cavagnaro, The University of Adelaide. Lab Protocols & Kranabetter et al. 2007):

Soil was sieved through a 2 mm sieve within 24 hours of being collected. Roughly 5 g dry weight equivalent (5.75 g wet weight) soil was placed into 50 mL centrifuge tubes, and 25 mL of 2 M KCl was added. Tubes were shaken end-to-end on a platform shaker for 60 min at 100 rpm. They were then centrifuged at 850 *g* for 15 min to form a pellet. The supernatant was transferred to 15 mL centrifuge tubes, and frozen at -20 °C until analysis.

Ammonium:

11 μL of KCl extract was added to a 96-well plate containing 140 μL each of reagent A (100 mL dH2O, 6.5 g Na salicylate, 5 g Na citrate, 5 g Na tartrate dibasic dihydrate, 0.025 g Na nitroprusside), and reagent B (6 g NaOH, 2.4 mL bleach). Samples were then read at 650 nm after 1 hr. Blanks and standards were included using 2 M KCl and NH4 standard solution.

Nitrate:

33.22 μL of Reagent A (0.4 g of VCl3 added to 50 mL of 1 M HCl, swirled by hand and let sit for 10 min) was added to 265.77μL of reagent B (0.2 g of sulphanilamide and 0.01 g of N-­‐(1-­‐naphthyl)ethylenediamine dihydrochloride) dissolved in 400 mL milliQj). 299 µL of the reagent mix was added to each well of a 96- well plate, then 6 μL of KCl sample was be added. The plate was be moved to the fumehood and left overnight before being read at 540 nm.

Amino Acid extraction and quantification- modified from (Darrouzet-Nardi et al. 2013):

**﻿**Based off a fluorometric amino acid extraction and quantification method using o-phthaldialdehyde and b-mercaptoethanol (OPAME) in 96-well microplates with a 90 min incubation time using leucine as a standard.
